# Supplementary material for: Gold Nanoclusters Synthesized within Single-Chain Nanoparticles as Catalytic Nanoreactors in Water
Source: MDPI journal article supplement (doi:10.3390/polym16030378), 2024-01-30
Supplement: s1 [file s1]

## Supplementary Material

# Gold Nanoclusters Synthesized within Single-Chain Nanoparticles as Catalytic Nanoreactors in Water

*Jokin Pinacho-Olaciregui<sup>1,2</sup>, Ester Verde-Sesto<sup>1,3</sup>, Daniel Taton<sup>2</sup> and José A. Pomposo<sup>1,3,4,\*</sup>*

<sup>1</sup>Centro de Física de Materiales (CSIC–UPV/EHU)–Materials Physics Center MPC, Pº Manuel Lardizabal 5, E-20018 Donostia, Spain.

<sup>2</sup>Laboratoire de Chimie des Polymères Organiques (LCPO), Université de Bordeaux INP–ENSCBP, 16 av. Pey Berland, 33607 Pessac cedex, France.

<sup>3</sup>IKERBASQUE–Basque Foundation for Science, Plaza Euskadi 5, E-48009 Bilbao, Spain.

<sup>4</sup>Departamento de Polímeros y Materiales Avanzados: Física, Química y Tecnología. University of the Basque Country (UPV/EHU), Pº Manuel Lardizabal 3, E-20800 Donostia, Spain.

\* Corresponding author: [josetxo.pomposo@ehu.eus](mailto:josetxo.pomposo@ehu.eus)

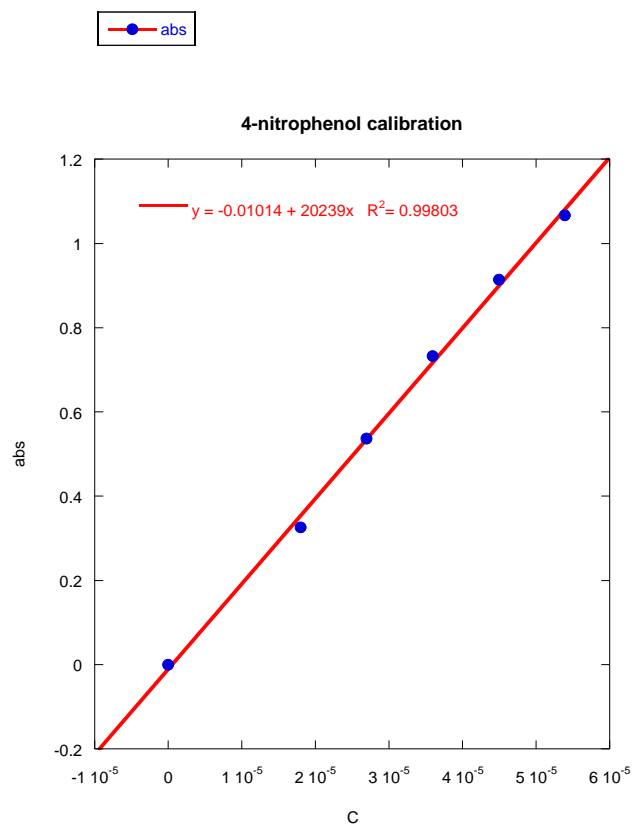

**Figure S1.** Calibration curve for determination of the UV-Vis molar extinction coefficient of 4-nitrophenol in water at r.t.:  $\varepsilon(\lambda_{\max} = 400 \text{ nm}) \approx 20239 \text{ M}^{-1}\text{cm}^{-1}$ . Literature value:  $\varepsilon(\lambda_{\max} = 400 \text{ nm}) \approx 18900 \text{ M}^{-1}\text{cm}^{-1}$  (Coiffier A. *et al. J. Mater. Chem.* **2001**, 11, 2039).

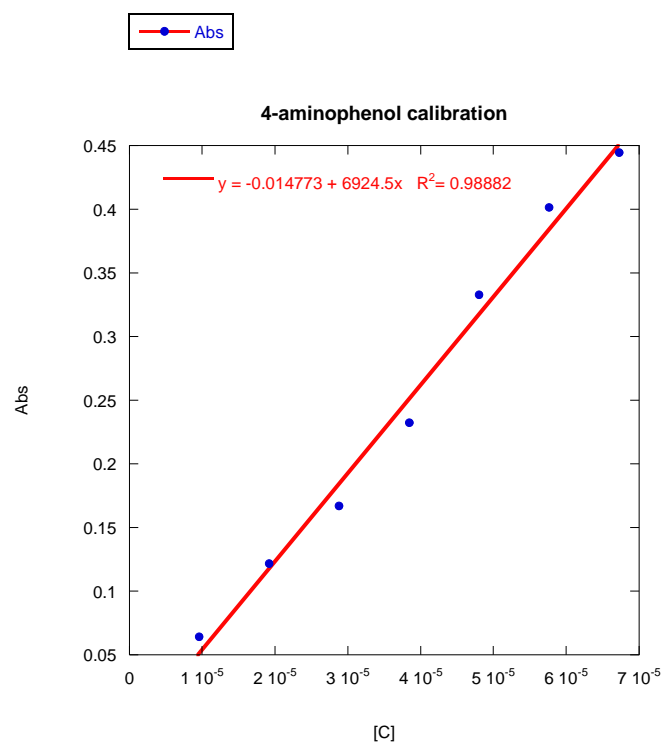

**Figure S2.** Calibration curve for determination of the UV-Vis molar extinction coefficient of 4-aminophenol in water at r.t.:  $\varepsilon(\lambda_{\max} = 300 \text{ nm}) \approx 6925 \text{ M}^{-1}\text{cm}^{-1}$ .

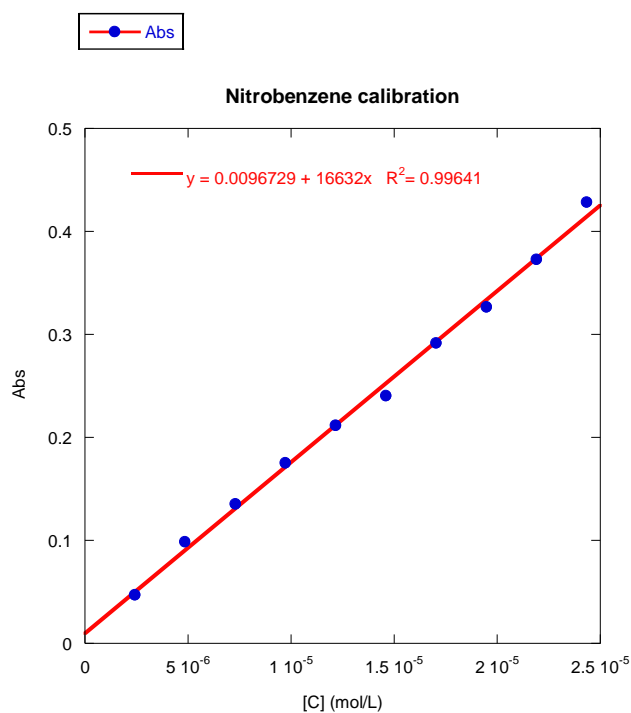

**Figure S3.** Calibration curve for determination of the UV-Vis molar extinction coefficient of nitrobenzene in water at r.t.:  $\epsilon$  ( $\lambda_{\max} = 265 \text{ nm}$ )  $\approx 16632 \text{ M}^{-1}\text{cm}^{-1}$ .

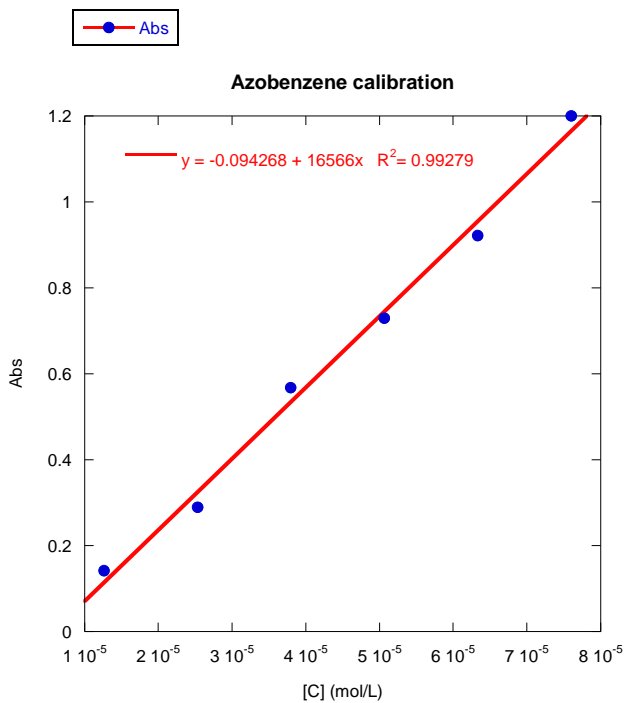

**Figure S4.** Calibration curve for determination of the UV-Vis molar extinction coefficient of azobenzene in water at r.t.:  $\epsilon$  ( $\lambda_{\max} = 230 \text{ nm}$ )  $\approx 16566 \text{ M}^{-1}\text{cm}^{-1}$ .

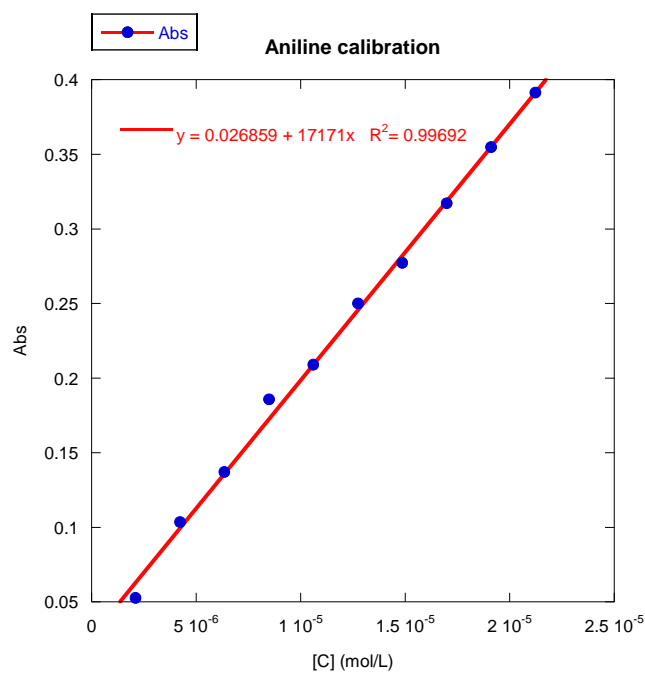

**Figure S5.** Calibration curve for determination of the UV-Vis molar extinction coefficient of aniline in water at r.t.:  $\epsilon$  ( $\lambda_{\text{max}} = 230 \text{ nm}$ )  $\approx 20239 \text{ M}^{-1}\text{cm}^{-1}$ .

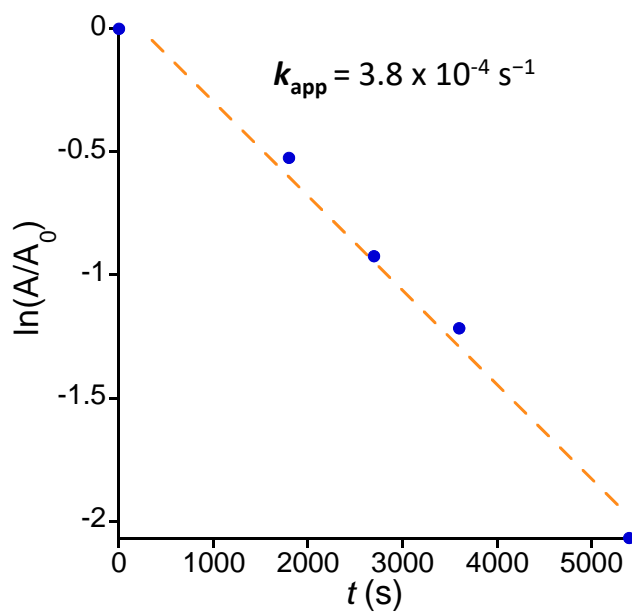

**Figure S6.** Apparent kinetic constant ( $k_{\text{app}}$ ) of the reduction of nitrobenzene to aniline catalyzed by Au-NCs/SCNPs.

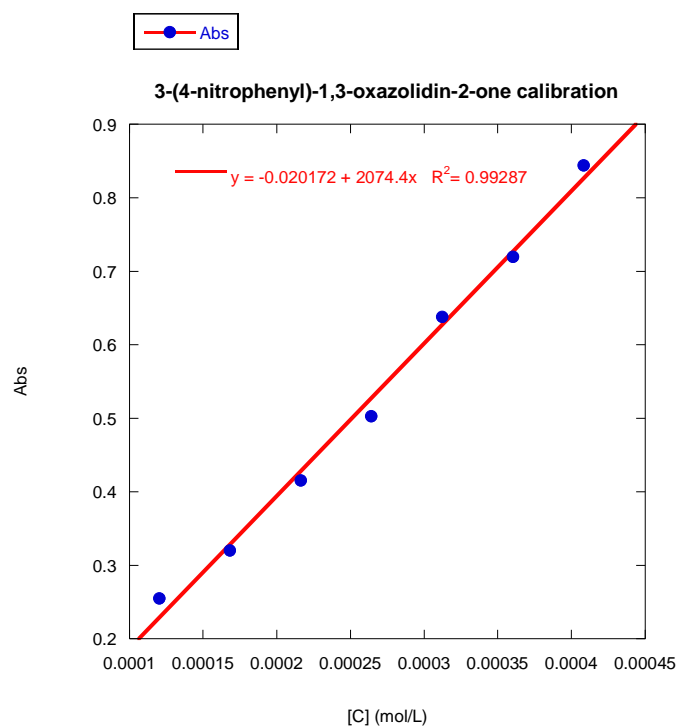

**Figure S7.** Calibration curve for determination of the UV-Vis molar extinction coefficient of 3-(4-nitrophenyl)-1,3-oxazolidin-2-one in water at r.t.:  $\epsilon$  ( $\lambda_{\max} = 320 \text{ nm}$ )  $\approx 2074 \text{ M}^{-1}\text{cm}^{-1}$ .

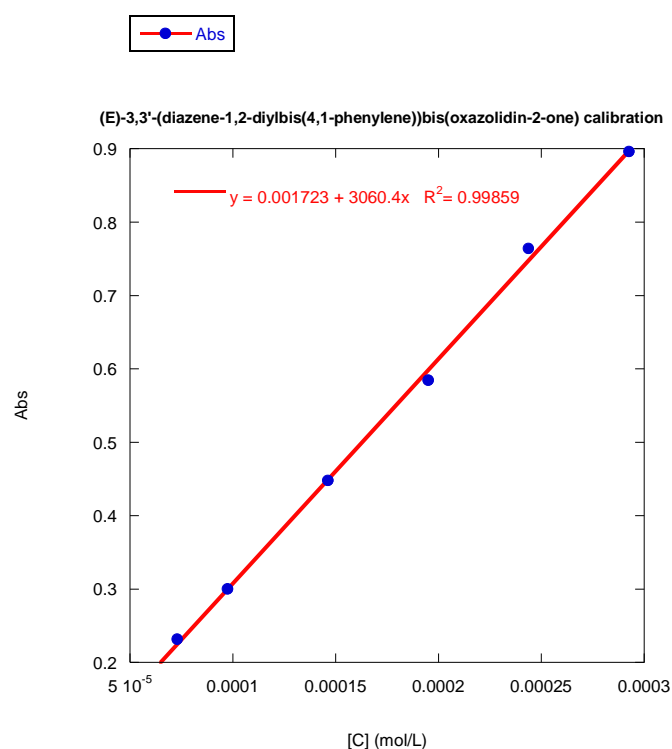

**Figure S8.** Calibration curve for determination of the UV-Vis molar extinction coefficient of (Z)-3,3'-(diazene-1,2-diylbis(4,1-phenylene))bis(oxazolidin-2-one) in water at r.t.:  $\epsilon$  ( $\lambda_{\max} = 360 \text{ nm}$ )  $\approx 3060 \text{ M}^{-1}\text{cm}^{-1}$ .

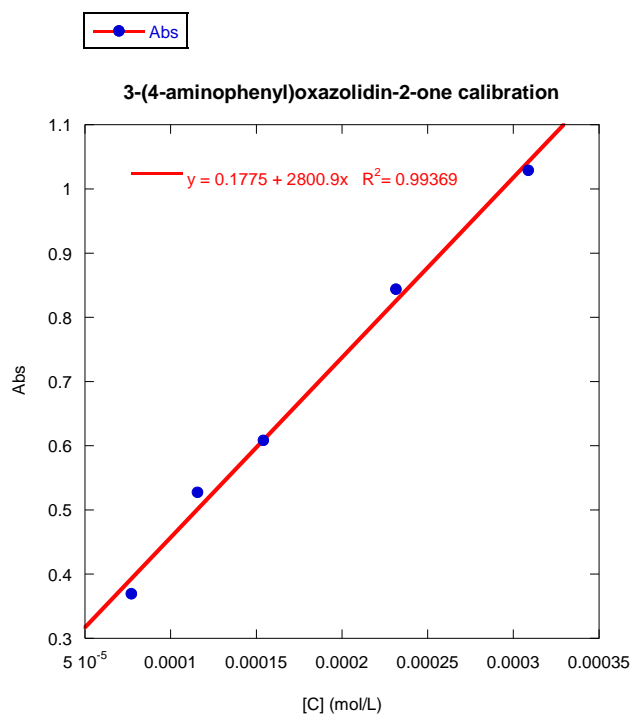

**Figure S9.** Calibration curve for determination of the UV-Vis molar extinction coefficient of 3-(4-aminophenyl)-1,3-oxazolidin-2-one in water at r.t.:  $\epsilon(\lambda_{\text{max}} = 250 \text{ nm}) \approx 2801 \text{ M}^{-1}\text{cm}^{-1}$ .

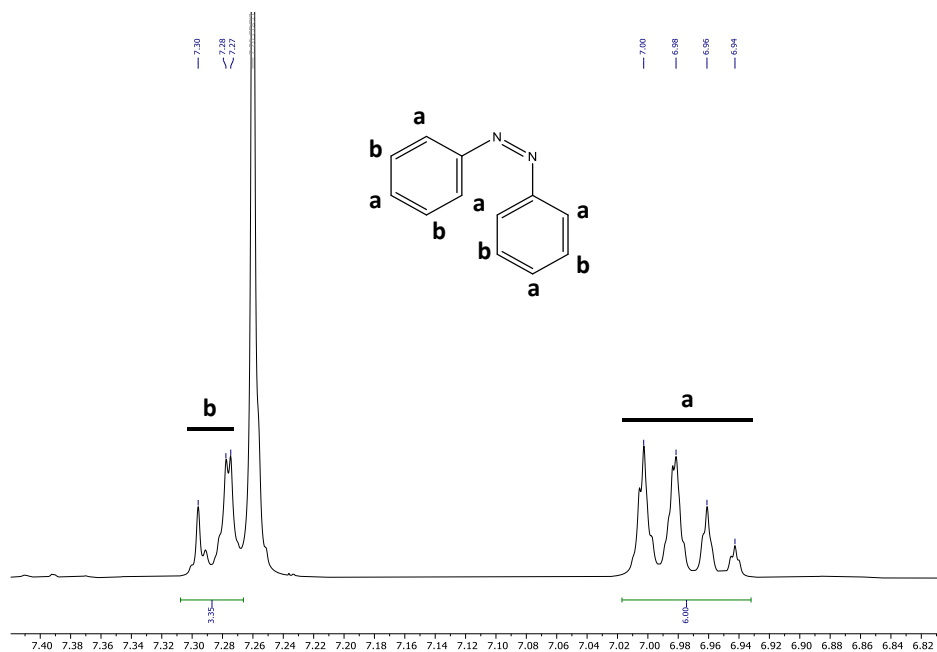

**Figure S10.**  $^1\text{H}$  MNR spectrum after isolation *via* preparative TCL of the *cis*-azobenzene intermediate species.

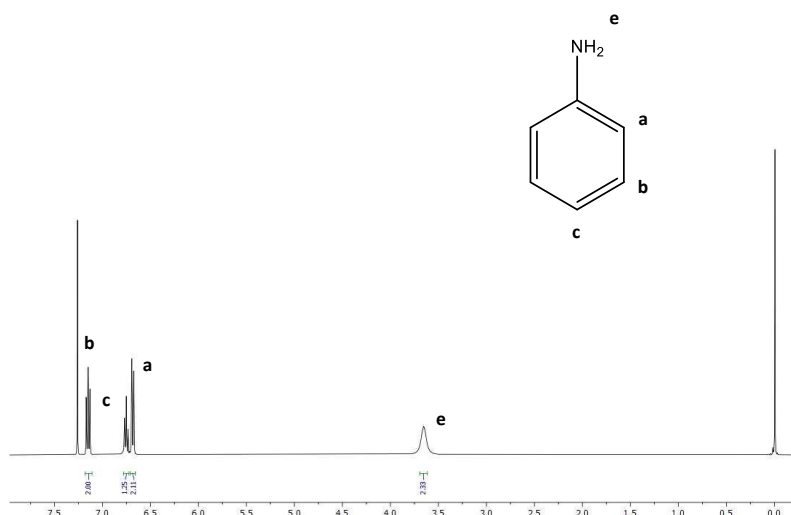

**Figure S11.** <sup>1</sup>H MNR spectrum after isolation *via* preparative TCL of the aniline product.

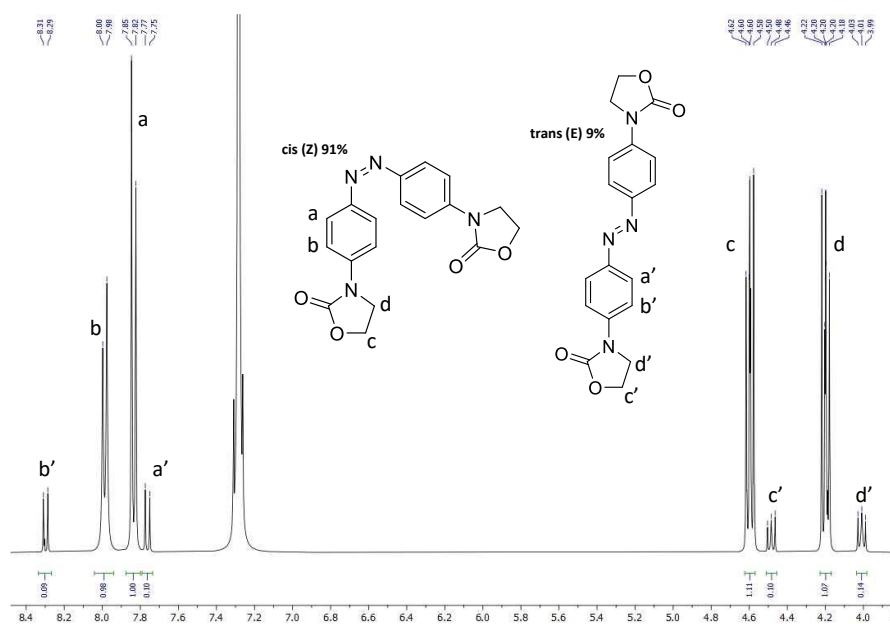

**Figure S12.** <sup>1</sup>H MNR spectrum after isolation *via* preparative TCL of the (Z)-3,3'-(diazene-1,2-diylbis(4,1-phenylene))bis(oxazolidin-2-one) intermediate species.

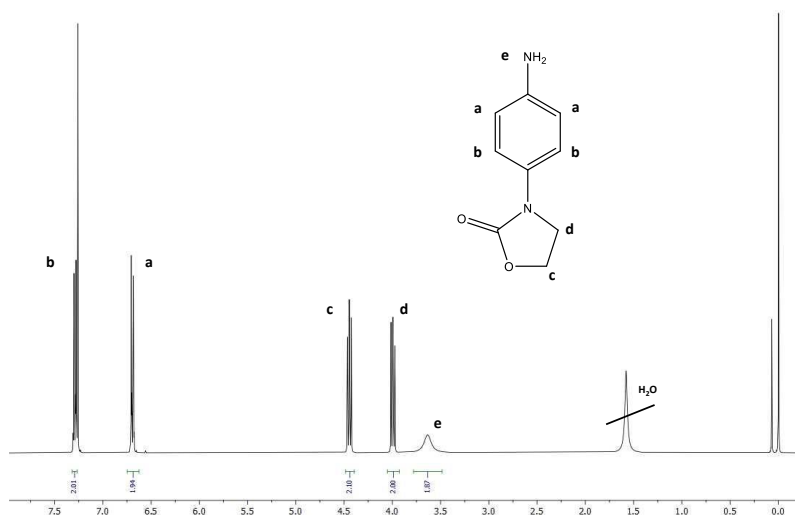

**Figure S13.**  $^1\text{H}$  MNR spectrum after isolation *via* preparative TLC of the 3-(4-aminophenyl)-1,3-oxazolidin-2-one product.
